# Supplementary material
Source: publisher figshare collection journal article supplement (https://karger.figshare.com/ndownloader/files/40845158)
Supplement: Supplementary file 1 [file 40845158]

**Supplementary material**

**Figure S1.** Flow chart describing the selection of the study population.

Abbreviations: MIA, malnutrition, inflammation, and atherosclerosis cohort; IAR, interleukin-6 to albumin ratio.

**
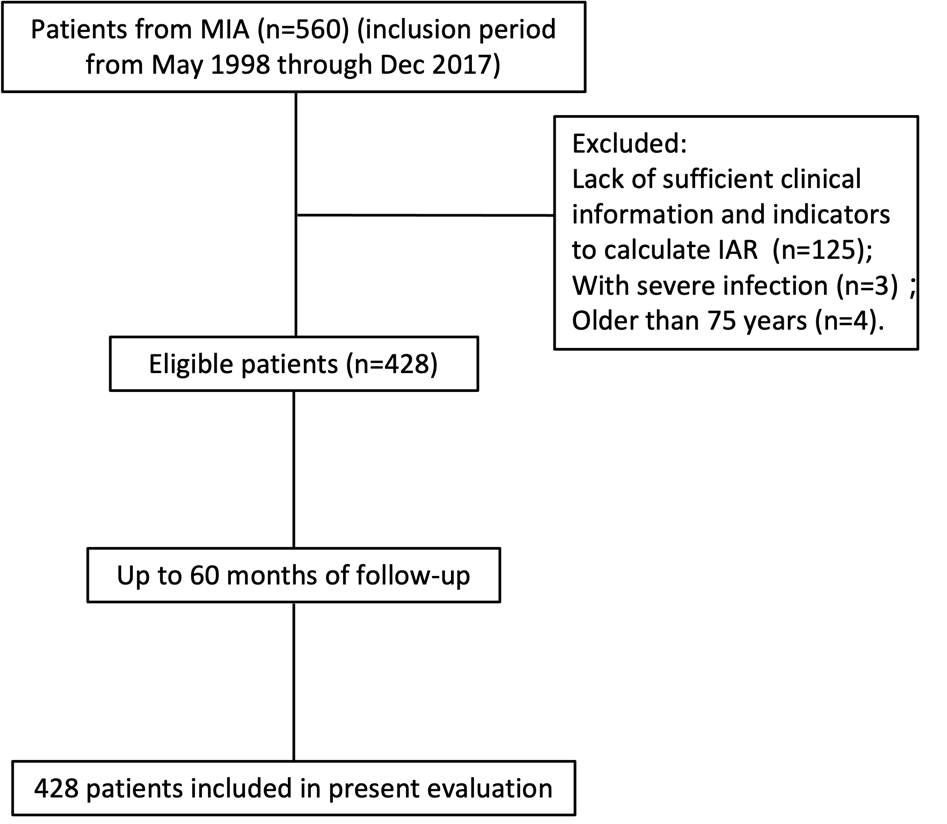
**

**Figure S2.** Median (25th to 75th percentile) baseline interleukin-6 to albumin ratio (IAR; crude values) in survivors and non-survivors. * P<0.001

**
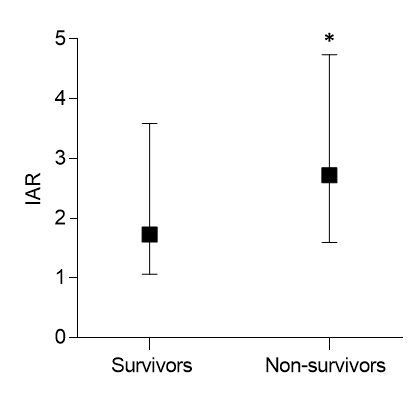
**

**Figure S3.** Area under the ROC curve (AUC) with 95% confidence interval (CI) of risk factors to predict all-cause and cardiovascular (CV) mortality at 60 months in 428 incident dialysis patients. **Abbreviations:** hsCRP, high-sensitivity C-reactive protein; CAR, hsCRP to albumin ratio; IL-6, interleukin-6; IAR, interleukin-6 to albumin ratio.


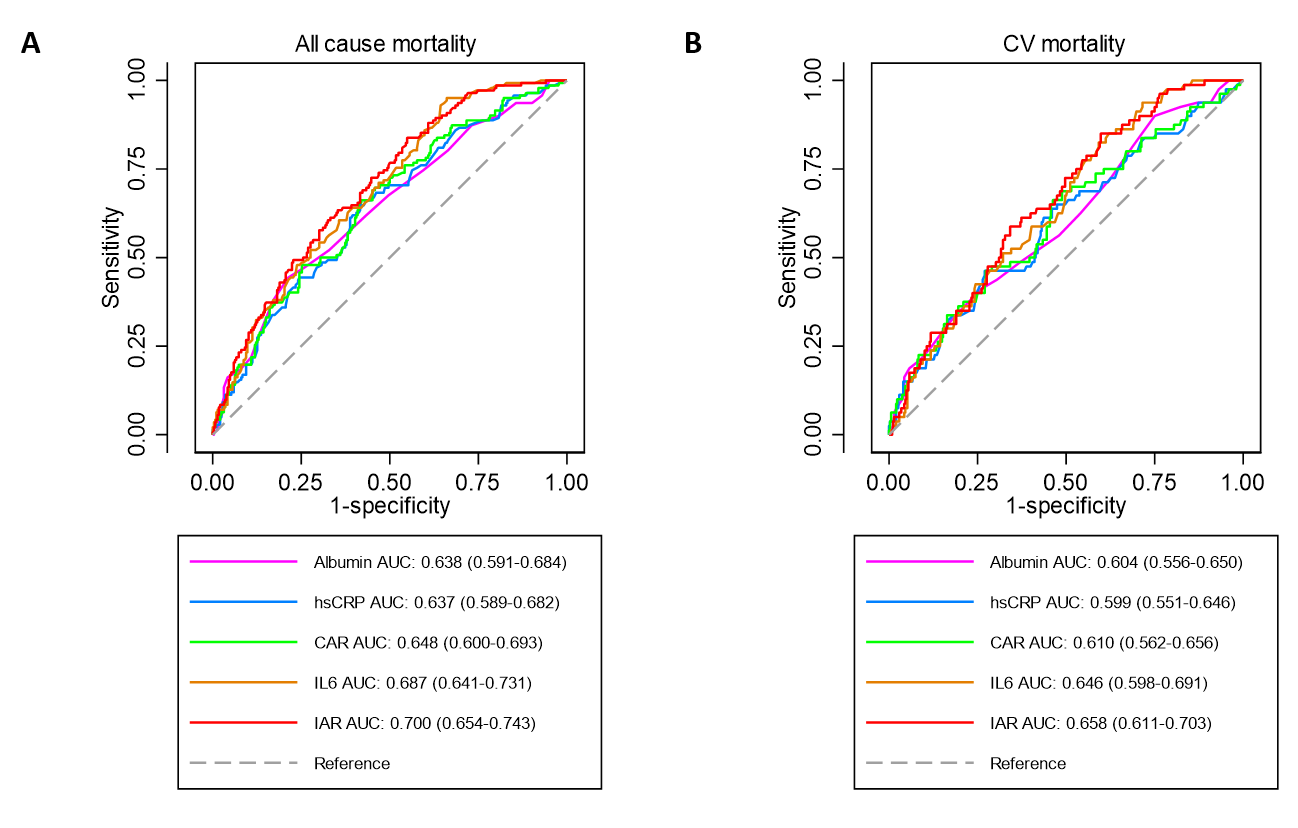


**Table S1.** Correlations between interleukin-6 to albumin ratio (IAR) and continuous (Spearman rank correlations; rho) and dichotomous (Kruskal-Wallis test; ꭕ2) variables, respectively.

|  | **rho** | **P-value** |
| --- | --- | --- |
| Age (year) | 0.32 | <0.001 |
| HDL-C (mmol/L) | -0.20 | <0.001 |
| Hemoglobin (g/L) | -0.20 | <0.001 |
| WBC (*109/L) | 0.29 | <0.001 |
| hsCRP (mg/L) | 0.56 | <0.001 |
| BMI (kg/m2) | 0.13 | 0.009 |
|  | **ꭕ2** | **P-value** |
| Sex (male vs. female) | 3.67 | 0.055 |
| Presence of diabetes mellitus | 30.08 | <0.001 |
| Presence of cardiovascular disease | 48.28 | <0.001 |
| Smoking | 11.47 | <0.001 |

**Abbreviations:** HDL-C, high-density lipoprotein cholesterol; WBC, white blood cell; hsCRP, high-sensitivity C-reactive protein; BMI, body mass index.
